# Supplementary material for: Identification of pathogen(s) in infectious diseases using shotgun metagenomic sequencing and conventional culture: a comparative study
Source: PeerJ. 2021 Jun 29;9:e11699. doi: 10.7717/peerj.11699 (PMC8253115; doi:10.7717/peerj.11699)
Supplement: Supplemental Information 1 [file peerj-09-11699-s001.xlsx]

## Sheet: Sheet1
Supplementary Table 1 The threshold of taxonomy relative abundance in genus level.
Taxonomy	Threshold of relative abundance
Abiotrophia	0
Acaryochloris	0
Acetobacter	4e-05
Acetobacterium	3.7e-05
Acetohalobium	0
Acetonema	0
Acholeplasma	6e-06
Achromobacter	0.00128
Acidilobus	0
Acidipropionibacterium	8e-06
Acidithiobacillus	3e-05
Acidobacterium	2.6e-05
Acidomonas	0
Acidovorax	0.05559
Aciduliprofundum	0
Acinetobacter	0.02956
Actinoalloteichus	0
Actinobacillus	0.000129
Actinobaculum	0
Actinomyces	2.1e-05
Actinomycetospora	0
Actinoplanes	0.002691
Actinopolymorpha	0
Advenella	0
Aerococcus	0.002501
Aeromicrobium	0
Aeromonas	0.00671
Aestuariimicrobium	0.00013
Afipia	2e-05
Aggregatibacter	0.00377
Agreia	0
Agrobacterium	0.02586
Agrococcus	0
Ahrensia	2e-05
Akkermansia	0
Alcaligenes	0.02902
Alcanivorax	0.00137
Algoriphagus	0
Aliivibrio	0
Alishewanella	0
Alistipes	0
Alkaliflexus	0
Alkalilimnicola	0
Alkaliphilus	0
Alkanindiges	2.5e-05
Allochromatium	0
Alloiococcus	0.000178
Alteromonas	6e-05
Amphritea	0
Amycolatopsis	0.000305
Anabaena	0
Anaerococcus	0
Anaeroglobus	0.000167
Anaerolinea	0
Anaeromyxobacter	3.5e-05
Anaerophaga	2.7e-05
Anaerostipes	0
Anaerovibrio	0
Anaerovorax	0
Andreprevotia	0.000119
Aneurinibacillus	0
Anoxybacillus	0
Aphanizomenon	0
Aquabacterium	0
Aquaspirillum	0
Aquifex	0
Aquitalea	0
Arcanobacterium	5.5e-05
Archaeoglobus	0
Archangium	0
Arcobacter	0
Arenimonas	0
Aromatoleum	3e-05
Arsenicicoccus	0
Arthrobacter	0.005439
Arthrospira	0.000156
Asanoa	0
Asticcacaulis	0.0326
Atlantibacter	0
Atopococcus	0.000173
Aurantimonas	0
Austwickia	0
Azoarcus	0.008787
Azospira	0
Azospirillum	0.006745
Azotobacter	0.00139
Bacillus	0.00749
Bacteroides	0.006355
Balneola	2e-05
Barnesiella	0
Bartonella	0.006335
Bavariicoccus	0
Bdellovibrio	8.1e-05
Beggiatoa	0
Beijerinckia	0.002584
Bergeyella	0
Beutenbergia	0.00138
Bifidobacterium	0.001205
Blastopirellula	0
Blautia	0
Bordetella	0.006404
Brachybacterium	0.007995
Brachyspira	0
Bradyrhizobium	0.3054
Brenneria	4.3e-05
Brevibacterium	0
Brochothrix	0
Brucella	0.01723
Budvicia	0
Burkholderia	0.4018
Buttiauxella	0
Caballeronia	0
Caedibacter	4.5e-05
Caenispirillum	0
Caldalkalibacillus	0
Caldanaerobius	6e-05
Caldicoprobacter	0
Caldilinea	0
Calditerricola	0
Calditerrivibrio	0
Calothrix	0
Campylobacter	0.001425
Candida	0.1704
Candidatus Brocadia	0
Candidatus Caldiarchaeum	0
Candidatus Jidaibacter	0
Candidatus Koribacter	7.3e-05
Candidatus Magnetobacterium	0
Candidatus Magnetoglobus	0
Candidatus Methylomirabilis	0
Candidatus Midichloria	0
Candidatus Parvarchaeum	0
Candidatus Pelagibacter	2e-05
Candidatus Phytoplasma	2e-05
Candidatus Protochlamydia	2.5e-05
Candidatus Scalindua	0
Capnocytophaga	0.01005
Cardiobacterium	2.3e-05
Carnobacterium	0.00172
Castellaniella	0.000109
Catelliglobosispora	0
Catenibacterium	0
Catenulispora	1.5e-05
Catonella	0
Caulobacter	0.04745
Cecembia	4e-05
Cellulomonas	0
Cellulosimicrobium	0
Cellvibrio	0.008957
Chamaesiphon	0
Chelatococcus	2e-05
Chitinispirillum	4e-05
Chlamydia	0.003004
Chlorobaculum	0
Chlorobium	0
Chloroflexus	0.000149
Chlorogloeopsis	0.000112
Chondromyces	0.00015
Chromobacterium	0.000735
Chroococcidiopsis	0.004525
Chryseobacterium	0
Chthoniobacter	7e-05
Chthonomonas	0
Citricoccus	0
Citrobacter	0.00144
Clavibacter	0.003335
Cloacibacillus	0
Clonorchis	0
Clostridiisalibacter	0
Clostridioides	0
Clostridium	0.006687
Cohnella	4e-05
Coleofasciculus	0
Collimonas	0.002035
Colwellia	0
Comamonas	0.01606
Congregibacter	4.7e-05
Coprobacillus	0
Coprococcus	0
Corallococcus	9.5e-05
Corynebacterium	0.0924
Coxiella	0
Criblamydia	4.1e-05
Crinalium	0
Crocosphaera	6.3e-05
Cronobacter	6.5e-05
Cupriavidus	0.02621
Curtobacterium	0
Curvibacter	1.3e-05
Cutibacterium	0.002069
Cyanobacterium	0
Cyanobium	4e-05
Cyanothece	0
Cycloclasticus	0
Cylindrospermopsis	0.00108
Cylindrospermum	0
Cystobacter	0
Dactylococcopsis	0
Dechloromonas	0.00371
Deefgea	3e-05
Deinococcus	0.0386
Delftia	0.00708
Dermabacter	2.5e-05
Dermacoccus	0
Dermatophilus	0
Desulfatirhabdium	0
Desulfobacca	0
Desulfobacterium	2e-05
Desulfobulbus	0
Desulfococcus	0.000128
Desulfosarcina	0.000101
Desulfospira	0
Desulfosporosinus	0
Desulfotignum	3e-05
Desulfotomaculum	4e-05
Desulfovibrio	0.005389
Desulfurispirillum	4e-05
Desulfurivibrio	7e-05
Desulfurobacterium	1e-05
Devosia	0
Devriesea	2.5e-05
Dialister	2.4e-05
Diaphorobacter	3e-05
Dickeya	6e-05
Dietzia	0
Diplosphaera	0
Dolosigranulum	6e-05
Dorea	0
Dysgonomonas	0
Ectothiorhodospira	0
Edaphobacter	0
Edwardsiella	0
Eggerthella	0
Eggerthia	0
Ehrlichia	2e-05
Eisenibacter	2e-05
Elioraea	2e-05
Elizabethkingia	2e-05
Elstera	0
Endozoicomonas	1.5e-05
Enhydrobacter	6e-05
Enhygromyxa	0
Enterobacter	0.008713
Enterococcus	0.00179
Epulopiscium	2e-05
Eremococcus	3e-05
Erwinia	0.000455
Erysipelatoclostridium	0
Erythrobacter	0.008659
Escherichia	0
Estrella	0
Eubacterium	0.001145
Eudoraea	0
Ewingella	0
Exiguobacterium	0.00344
Facklamia	0
Faecalibacterium	0
Ferrimonas	0
Ferrovum	0
Fervidicoccus	0
Fervidicola	3.4e-05
Fibrella	0
Filifactor	0
Fimbriimonas	0
Finegoldia	0.002255
Fischerella	0.000143
Flavobacterium	0.0103
Flexistipes	0
Fluoribacter	0
Fluviicola	0
Fodinicurvata	6.6e-05
Francisella	3.5e-05
Frankia	1e-05
Fusobacterium	0.000185
Gallaecimonas	0
Gallibacterium	0
Gallionella	0
Gardnerella	0.00836
Geitlerinema	0.000891
Gemella	4e-05
Geminicoccus	3e-05
Gemmata	2e-05
Geobacillus	4.5e-05
Geobacter	0.001295
Geopsychrobacter	5e-05
Gilvimarinus	0
Glaciecola	0
Gloeocapsa	0.00012
Glutamicibacter	0
Gordonia	0.009556
Gossypium	0.000742
Gottschalkia	0
Gracilibacillus	0
Granulibacter	3.5e-05
Granulicatella	0.000215
Granulicella	0
Granulicoccus	0
Gulosibacter	0
Haemophilus	0.0128
Hafnia	0
Hahella	0
Halanaerobium	0
Haliangium	0
Haliea	0
Haliscomenobacter	2e-05
Halobacillus	0
Halococcus	0
Haloferax	0
Halomonas	0.000145
Halotalea	0
Halothermothrix	0
Helcobacillus	0
Helcococcus	0
Helicobacter	0
Heliobacterium	0
Herbaspirillum	0.004525
Herpetosiphon	5.9e-05
Holdemania	0
Hyalangium	2e-05
Hydrocarboniphaga	0
Hydrogenivirga	1.4e-05
Hylemonella	0
Hyperthermus	4.2e-05
Hyphomonas	0
Idiomarina	0.008109
Ignavibacterium	0
Ignicoccus	0
Ignisphaera	2e-05
Inquilinus	2e-05
Intrasporangium	0.001055
Isoptericola	0
Ixodes	0
Janibacter	0
Janthinobacterium	0.01548
Jejuia	0
Jeotgalicoccus	2e-05
Johnsonella	0
Joostella	0
Kamptonema	4e-05
Kangiella	2e-05
Kerstersia	7e-05
Kiloniella	7e-05
Kineosphaera	0
Kinetoplastibacterium	0
Klebsiella	0.007195
Kluyvera	0
Knoellia	0
Kocuria	0.01105
Kordia	0
Kordiimonas	0
Kouleothrix	0
Ktedonobacter	0
Kutzneria	0
Kytococcus	0.01054
Labrenzia	4e-05
Lachnoclostridium	0
Lachnospira	0
Lacinutrix	0
Lacticigenium	0
Lactobacillus	0.01315
Lactococcus	0.00331
Lambdavirus	0
Laribacter	0.000255
Lechevalieria	0
Legionella	3e-05
Leifsonia	0
Lentisphaera	2e-05
Lentzea	0
Leptolinea	0
Leptolyngbya	0.000457
Leptonema	2e-05
Leptospira	8.5e-05
Leptotrichia	0.003445
Leucobacter	0
Leuconostoc	0.00287
Levilinea	0
Lewinella	0.000146
Limnohabitans	0
Lipotes	0
Listeria	0.00092
Loktanella	0
Longilinea	0
Luteibacter	0
Luteipulveratus	0
Lyngbya	0.000336
Lysinibacillus	0
Lysobacter	0
Magnetospirillum	0.000415
Mahella	0
Mannheimia	0
Marinilabilia	0
Marinimicrobium	0
Marinitoga	0
Marinobacter	0.000515
Marinobacterium	1.6e-05
Marinomonas	0
Marinospirillum	0
Marivirga	0
Marvinbryantia	0
Massilia	0
Mastigocladopsis	8e-05
Mastigocladus	0
Mastigocoleus	0
Megamonas	6.1e-05
Megasphaera	0.00047
Meiothermus	0.0157
Melissococcus	3e-05
Methanobacterium	0
Methanobrevibacter	0
Methanocaldococcus	0
Methanocella	0
Methanococcus	0
Methanoculleus	2e-05
Methanolinea	0
Methanopyrus	0
Methanoregula	4e-05
Methanosaeta	0
Methanosarcina	0
Methanospirillum	7e-05
Methanothermococcus	0
Methanothermus	0
Methanotorris	0
Methylacidiphilum	3.5e-05
Methylobacillus	0
Methylobacter	4e-05
Methylobacterium	0.3844
Methylocaldum	2e-05
Methylocella	0.000155
Methylococcus	0
Methylocystis	0.0003515
Methylohalobius	0
Methylomarinum	0
Methylomonas	2e-05
Methylophilus	0
Methylosarcina	1.5e-05
Methyloversatilis	3.1e-05
Methylovorus	0.00233
Methylovulum	2e-05
Micavibrio	0
Microbacterium	0.004945
Microbispora	0
Microchaete	0
Micrococcus	0.02694
Microcoleus	0
Microcystis	0
Microlunatus	0
Micromonospora	0.00093
Microvirga	0
Microvirgula	0
Mobilicoccus	0
Mobiluncus	0.00194
Moellerella	3e-05
Mogibacterium	0
Moorea	0.0002
Moorella	4e-05
Moraxella	0.01381
Morganella	0.004821
Moritella	5e-05
Morococcus	0
Mucilaginibacter	0
Mucispirillum	0
Mycetocola	0
Mycobacterium	0.00961
Myroides	0.000275
Myxococcus	0.000508
Nanoarchaeum	0
Natrialba	0.00035
Natronococcus	0
Natronolimnobius	2.3e-05
Neisseria	0.009675
Neptuniibacter	0
Nesiotobacter	0
Nesterenkonia	0
Nicotiana	0
Nisaea	0
Nitratireductor	0
Nitratiruptor	0
Nitrincola	0
Nitrosococcus	2.5e-05
Nitrosomonas	0.0051
Nitrosopumilus	0
Nitrososphaera	0
Nitrosospira	0.000294
Nitrospina	0
Nocardia	0.001775
Nocardioides	0.00541
Nocardiopsis	0.0005598
Nodosilinea	0
Nodularia	8e-05
Nonlabens	0
Nonomuraea	0
Nostoc	0.000114
Novispirillum	0
Occidentia	4e-05
Oceanibaculum	5e-05
Oceanibulbus	0
Oceanicaulis	0
Oceanimonas	0
Oceanospirillum	0
Ochrobactrum	0.01359
Odoribacter	0
Oenococcus	0
Oleispira	0
Oligella	0
Olsenella	2.6e-05
Orenia	0
Oribacterium	0
Ornithinibacillus	0
Ornithinimicrobium	0
Oscillatoria	0
Oscillibacter	0
Owenweeksia	0
P1virus	0
P2virus	2.1e-05
Paenibacillus	0
Paeniclostridium	0
Paeniglutamicibacter	0
Palaeococcus	0.000119
Pandoraea	0.00451
Pannonibacter	0
Pantoea	0.00604
Parabacteroides	2.5e-05
Paraburkholderia	0.000161
Parachlamydia	0
Paracoccus	0.01323
Paraprevotella	0
Parvibaculum	0.007385
Parvimonas	0
Pasteurella	2e-05
Pectobacterium	0.004819
Pediococcus	0
Pedobacter	6.5e-05
Pedosphaera	0.0004
Pelodictyon	0
Pelosinus	0
Peptoanaerobacter	0
Peptoniphilus	8e-05
Persephonella	0
Phaeospirillum	0
Phenylobacterium	0.006702
Photobacterium	0
Photorhabdus	0.000193
Phycicoccus	0
Phycisphaera	0
Pimelobacter	0
Pirellula	2.3e-05
Piscirickettsia	0
Planktothrix	0.000108
Planococcus	0
Plantago	0
Plantibacter	0
Plesiocystis	0.000165
Plesiomonas	0
Pleurocapsa	6.1e-05
Polaromonas	0.005783
Pontibacillus	0
Pontibacter	4e-05
Porphyromonas	0.008443
Porticoccus	0
Prauserella	0
Prevotella	0.01677
Prochlorococcus	0.000263
Prochlorothrix	4e-05
Propionibacterium	0.6029
Propionicicella	0
Proteiniphilum	0
Proteus	0.01031
Providencia	0
Pseudacidovorax	0
Pseudaminobacter	0
Pseudanabaena	9.9e-05
Pseudarthrobacter	0
Pseudoalteromonas	0.00018
Pseudoclavibacter	0.000127
Pseudogulbenkiania	0
Pseudomonas	0.02461
Pseudonocardia	0.00031
Pseudopropionibacterium	0
Pseudoxanthomonas	0.007685
Psychrobacter	0.01281
Pusillimonas	0
Pyrococcus	0.000123
Pyrolobus	0
Rahnella	3e-05
Ralstonia	0.1231
Raoultella	0.00013
Rathayibacter	0
Reyranella	6e-05
Rheinheimera	0
Rhizobium	0.01571
Rhodanobacter	0.00015
Rhodococcus	0.005285
Rhodomicrobium	0.0003156
Rhodopirellula	0
Rhodopseudomonas	0.01792
Rhodospirillum	0.004566
Rhodothermus	0
Rhodovibrio	0
Richelia	3e-05
Riemerella	0.00034
Rivularia	0.0003607
Robinsoniella	0
Roseateles	2.5e-05
Roseburia	4e-05
Roseiflexus	2.6e-05
Roseobacter	0
Rothia	0.01405
Rubidibacter	2e-05
Rubritepida	1e-05
Rubrivivax	0.005425
Rudanella	6e-05
Ruegeria	0.003275
Ruminiclostridium	0.000148
Ruminococcus	0.00022
Runella	6.5e-05
Saccharibacillus	0
Saccharomonospora	7e-05
Salinibacter	0
Salinicoccus	0
Salinimonas	0
Salinisphaera	0
Salisaeta	0
Salmonella	8e-05
Sandaracinus	3e-05
Sanguibacter	0.00105
Schlesneria	3.3e-05
Sciscionella	0
Scytonema	8.4e-05
Sebaldella	0
Sedimentibacter	0
Sediminispirochaeta	0
Segetibacter	0
Selenomonas	0
Serinicoccus	0
Serratia	0.005086
Shewanella	0.007105
Shigella	0.00302
Simiduia	0
Simonsiella	2e-05
Singulisphaera	0
Sinorhizobium	0.01391
Skermanella	3e-05
Sneathiella	0.000115
Sodalis	0
Solibacillus	4e-05
Solirubrobacter	0
Sorangium	0.00025
Sphaerobacter	8e-05
Sphaerotilus	2e-05
Sphingobacterium	0
Sphingobium	0
Sphingomonas	2e-05
Sphingopyxis	1.9e-05
Spirillospora	0.000101
Spirochaeta	0
Spirosoma	1.5e-05
Spirulina	3.2e-05
Sporolactobacillus	0
Sporomusa	0
Sporosarcina	0
Stanieria	2.3e-05
Staphylococcus	0.2322
Staphylothermus	6e-05
Stenotrophomonas	0.00565
Stigmatella	0
Streptacidiphilus	5.3e-05
Streptococcus	0.03676
Streptomyces	0.002175
Subdoligranulum	0
Succinimonas	0
Sulfitobacter	0
Sulfolobus	0
Sulfuricella	0
Sulfurihydrogenibium	0
Sulfuritalea	0
Sutterella	0
Symbiobacterium	0
Synechococcus	0.00013
Synechocystis	2.4e-05
Tatumella	0
Taylorella	0
Tenacibaculum	0
Tepidanaerobacter	0
Tepidimonas	0
Terasakiella	0
Terriglobus	0
Tetragenococcus	0
Tetrasphaera	0
Thalassobaculum	3e-05
Thalassolituus	0
Thalassomonas	0
Thalassospira	0
Thauera	0.005735
Thermacetogenium	0
Thermanaerothrix	0
Thermanaerovibrio	0
Thermicanus	0
Thermithiobacillus	0
Thermoactinomyces	0
Thermoanaerobacter	0.04298
Thermoanaerobacterium	0
Thermobaculum	0.00013
Thermobispora	0
Thermococcus	0.000345
Thermocrispum	0
Thermodesulfobacterium	0
Thermofilum	7e-05
Thermogladius	5e-05
Thermomicrobium	0
Thermomonas	5.6e-05
Thermosediminibacter	0
Thermosinus	0
Thermosphaera	0
Thermosynechococcus	4e-05
Thermotalea	0
Thermovibrio	0
Thermus	0.0017
Thioalkalivibrio	0.001945
Thiobacillus	3e-05
Thiocapsa	0
Thioflavicoccus	0
Thiomargarita	0
Thiomicrospira	0
Thioploca	0
Thiothrix	0
Tistrella	0
Tomitella	0
Trabulsiella	0
Treponema	0
Trichormus	5e-05
Truepera	0
Trueperella	0
Tsukamurella	0
Turneriella	0
Ureaplasma	0
Vagococcus	0
Variovorax	0.007424
Veillonella	0.0218
Verrucomicrobium	0
Vibrio	0.00157
Virgibacillus	0
Vulcanisaeta	0
Waddlia	5.6e-05
Weissella	3e-05
Wolbachia	0
Xanthomonas	0.004872
Xenorhabdus	0.000126
Xylella	0.0012
Yersinia	0
Yokenella	0
