# Supplementary material for: Identification of pathogen(s) in infectious diseases using shotgun metagenomic sequencing and conventional culture: a comparative study
Source: PeerJ. 2021 Jun 29;9:e11699. doi: 10.7717/peerj.11699 (PMC8253115; doi:10.7717/peerj.11699)
Supplement: Supplemental Information 2 [file peerj-09-11699-s002.xlsx]

## Sheet: Sheet1
Supplementary Table 2 The details of specimen type in comparative analysis of culture and shotgun metagenomic sequencing results.
No	Specimen type	Culture results			WMGS results
		Bacterial results	Fungal results		Bacterial results (species)	Bacterial results (genus)	Fungal results
P1	Bile	Staphylococcus hominis (coagulase negative)	(-)		Escherichia coli*,	Acinetobacter*,	(-)
					Acinetobacter baumannii,	Staphylococcus
					Enterococcus faecalis,
					Staphylococcus epidermidis,
					Klebsiella pneumoniae
P2	Bile	Pseudomonas aeruginosa, Klebsiella pneumoniae	(-)		Pseudomonas aeruginosa*,	Pseudomonas*,	(-)
					Enterococcus faecalis,	Enterococcus
					Escherichia coli,
					Klebsiella pneumoniae
P3	Bile	Acinetobacter johnsonii	(-)		Escherichia coli*,	Acinetobacter*	(-)
					Acinetobacter baumannii,
					Klebsiella pneumoniae,
					Enterococcus faecalis
P4	Cyst fluid of liver	Escherichia coli	(-)		Pseudomonas aeruginosa*,	Pseudomonas*,	(-)
					Escherichia coli,	Staphylococcus,
					Klebsiella pneumoniae	Escherichia
P5	Ascites	(-)	Candida albicans		Pseudomonas aeruginosa*,	Pseudomonas*,	Candida albicans
					Klebsiella pneumoniae	Klebsiella
P6	CSF	Staphylococcus capitis (coagulase negative)	(-)		Escherichia coli*,	Staphylococcus*,	(-)
					Acinetobacter baumannii,	Acinetobacter
					Klebsiella pneumoniae,
					Enterococcus faecalis
P7	Bone marrow	Staphylococcus epidermidis (coagulase negative)	(-)		Acinetobacter baumannii*,	Acinetobacter*,	(-)
					Escherichia coli,	Staphylococcus
					Staphylococcus epidermidis
P8	Bone marrow	Klebsiella pneumoniae	(-)		Escherichia coli*,	Acinetobacter*,	(-)
					Acinetobacter baumannii,	Staphylococcus
					Enterococcus faecalis,
					Klebsiella pneumoniae
P9	CSF	Acinetobacter baumannii	(-)		Acinetobacter baumannii*,	Acinetobacter*,	(-)
					Escherichia coli,	Staphylococcus
					Staphylococcus epidermidis
P10	CSF	Streptococcus mitis	(-)		Escherichia coli*,	Acinetobacter*,	(-)
					Acinetobacter baumannii,	Streptococcus,
					Streptococcus sanguinis,	Staphylococcus
					Streptococcus infantis
P11	Joint aspirate (knee)	Staphylococcus aureus	(-)		Pseudomonas aeruginosa*,	Pseudomonas*,	(-)
					Klebsiella pneumoniae,	Klebsiella,
					Staphylococcus aureus	Staphylococcus
P12	CSF	Acinetobacter baumannii	(-)		Acinetobacter baumannii*,	Acinetobacter*	(-)
					Escherichia coli,
P13	Necrotic tissue	Pseudomonas putida	(-)		Escherichia coli*,	Acinetobacter*,	(-)
					Acinetobacter baumannii,	Streptococcus
					Streptococcus sanguinis,
					Klebsiella pneumoniae
P14	Necrotic tissue	Escherichia coli	(-)		Escherichia coli*,	Pseudomonas*,	(-)
					Acinetobacter baumannii	Acinetobacter
P15	Bile	Escherichia coli, Enterococcus faecium	(-)		Escherichia coli*,	Enterococcus*,	(-)
					Acinetobacter baumannii,	Acinetobacter
					Enterococcus faecalis,
					Klebsiella pneumoniae,
P16	Necrotic tissue	Escherichia coli, Enterococcus faecium	(-)		Enterococcus faecium		(-)
					Escherichia coli*,	Acinetobacter*
					Acinetobacter baumannii,
					Staphylococcus epidermidis,
					Enterococcus faecalis,
P17	CSF	Acinetobacter baumannii	(-)		Klebsiella pneumoniae		(-)
					Escherichia coli*,	Acinetobacter*,
					Acinetobacter baumannii,	Staphylococcus,
P18	Ascites	Acinetobacter lwoffii	(-)		Streptococcus sanguinis	Streptococcus	(-)
					Escherichia coli*,	Pseudomonas*,
					Acinetobacter baumannii,	Acinetobacter
P19	Pleural fluid	Aerococcus viridans, Acinetobacter lwoffii	(-)		Acinetobacter schindleri		(-)
					Acinetobacter baumannii*,	Acinetobacter*
					Alcaligenes faecalis,
					Alcaligenes faecalis,
P20	Necrotic tissue	(-)	(-)		Enterococcus faecalis		(-)
					Acinetobacter baumannii*,	Acinetobacter*
					Escherichia coli,
					Staphylococcus epidermidis,
					Enterococcus faecalis
Notes: * represents species of highest abundance. All species analyzed were described in this table. All species identified in the sequencing workflow were not listed due to the large number of species identified. Species listed were based on species that match abundance, and clinical relevance. Species identified in sequencing that match culture were shown in bold. Reference number cells were hi…
